# Supplementary material for: An individualized prognostic signature for gastric cancer patients treated with 5-Fluorouracil-based chemotherapy and distinct multi-omics characteristics of prognostic groups
Source: PubMed Central journal article supplement (PMC4891001; doi:10.18632/oncotarget.7087), 2016-01-30
Supplement: oncotarget-07-8743-s001.pdf [file oncotarget-07-8743-s001.pdf]

## An individualized prognostic signature for gastric cancer patients treated with 5-Fluorouracil-based chemotherapy and distinct multi-omics characteristics of prognostic groups

### Supplementary Materials

#### SUPPLEMENTARY RESULTS

##### Cisplatin therapeutic significance for gastric cancer

The E-MTAB-783 from ArrayExpress (<http://www.ebi.ac.uk/arrayexpress/>) included 11 gastric cancer cell lines with corresponding cisplatin IC<sub>50</sub> values. Using Pearson correlation analysis, with FDR < 0.2, no genes were found to be significantly correlated with cisplatin IC<sub>50</sub> values of the 11 gastric cancer cell lines. Therefore, with  $P < 0.05$ , we identified 555 IC<sub>50</sub>-related genes. Then,

based on the dataset GC123, we found that 42 of the 555 IC<sub>50</sub>-related genes were tended to be associated with patients' OS (univariate Cox model,  $P < 0.05$ ). However, the concordance score of the clinical relevance of these 42 cisplatin IC<sub>50</sub>-related genes was only 28.57% (binomial distribution test,  $P \approx 1$ ), implying that cisplatin IC<sub>50</sub>-related genes might lack correlation with clinical prognoses of patients receiving cisplatin-based chemotherapy. Therefore, cisplatin therapeutic significance for gastric cancer should be further investigated.

#### Supplementary Table S1: The pathways enriched with DEGs between the two prognostic groups of GC123

| Systemic name                                 | Pathway name                      | Number of annotated DEGs | P        |
|-----------------------------------------------|-----------------------------------|--------------------------|----------|
| The pathways enriched with up-regulated genes |                                   |                          |          |
| hsa03013                                      | RNA transport                     | 71                       | 1.11E-16 |
| hsa03040                                      | Spliceosome                       | 59                       | 1.11E-16 |
| hsa04110                                      | Cell cycle                        | 62                       | 1.11E-16 |
| hsa03010                                      | Ribosome                          | 54                       | 3.75E-13 |
| hsa03008                                      | Ribosome biogenesis in eukaryotes | 36                       | 5.82E-13 |
| hsa03050                                      | Proteasome                        | 25                       | 1.71E-09 |
| hsa03030                                      | DNA replication                   | 20                       | 1.00E-07 |
| hsa00240                                      | Pyrimidine metabolism             | 31                       | 1.34E-05 |
| hsa03430                                      | Mismatch repair                   | 13                       | 1.76E-05 |
| hsa03020                                      | RNA polymerase                    | 13                       | 1.08E-04 |
| hsa03420                                      | Nucleotide excision repair        | 17                       | 3.40E-04 |
| hsa03410                                      | Base excision repair              | 14                       | 3.96E-04 |
| hsa03015                                      | mRNA surveillance pathway         | 25                       | 6.87E-04 |
| hsa03022                                      | Basal transcription factors       | 15                       | 1.00E-03 |
| hsa03440                                      | Homologous recombination          | 11                       | 4.48E-03 |

|                                                 |                                                            |    |          |
|-------------------------------------------------|------------------------------------------------------------|----|----------|
| hsa04914                                        | Progesterone-mediated oocyte maturation                    | 23 | 4.59E-03 |
| hsa00230                                        | Purine metabolism                                          | 37 | 5.31E-03 |
| hsa04512                                        | ECM-receptor interaction                                   | 24 | 7.33E-03 |
| The pathways enriched with down-regulated genes |                                                            |    |          |
| hsa04640                                        | Hematopoietic cell lineage                                 | 31 | 4.69E-07 |
| hsa04672                                        | Intestinal immune network for IgA production               | 19 | 1.00E-06 |
| hsa00830                                        | Retinol metabolism                                         | 18 | 3.29E-06 |
| hsa04514                                        | Cell adhesion molecules (CAMs)                             | 37 | 3.88E-06 |
| hsa04650                                        | Natural killer cell mediated cytotoxicity                  | 34 | 2.61E-05 |
| hsa00982                                        | Drug metabolism - cytochrome P450                          | 18 | 6.74E-05 |
| hsa00980                                        | Metabolism of xenobiotics by cytochrome P450               | 18 | 2.22E-04 |
| hsa00601                                        | Glycosphingolipid biosynthesis - lacto and neolacto series | 11 | 2.31E-04 |
| hsa00340                                        | Histidine metabolism                                       | 10 | 4.85E-04 |
| hsa04612                                        | Antigen processing and presentation                        | 21 | 6.45E-04 |
| hsa00650                                        | Butanoate metabolism                                       | 10 | 7.48E-04 |
| hsa04666                                        | Fc gamma R-mediated phagocytosis                           | 23 | 1.23E-03 |
| hsa00071                                        | Fatty acid degradation                                     | 14 | 1.28E-03 |
| hsa00380                                        | Tryptophan metabolism                                      | 12 | 1.52E-03 |
| hsa04146                                        | Peroxisome                                                 | 20 | 2.03E-03 |
| hsa04971                                        | Gastric acid secretion                                     | 18 | 4.88E-03 |
| hsa00561                                        | Glycerolipid metabolism                                    | 13 | 5.02E-03 |
| hsa04660                                        | T cell receptor signaling pathway                          | 24 | 6.61E-03 |
| hsa04662                                        | B cell receptor signaling pathway                          | 18 | 6.84E-03 |
| hsa00051                                        | Fructose and mannose metabolism                            | 10 | 7.55E-03 |
| hsa00040                                        | Pentose and glucuronate interconversions                   | 7  | 9.81E-03 |
| hsa00512                                        | Mucin type O-Glycan biosynthesis                           | 7  | 9.81E-03 |

Abbreviation: DEGs, differential expressed genes.

**Supplementary Table S2: The pathways enriched with DEGs between the two prognostic groups of GC35**

| Systemic name                                 | Pathway name                                 | Number of annotated DEGs | P        |
|-----------------------------------------------|----------------------------------------------|--------------------------|----------|
| The pathways enriched with up-regulated genes |                                              |                          |          |
| hsa04672                                      | Intestinal immune network for IgA production | 5                        | 8.26E-04 |
| hsa04640                                      | Hematopoietic cell lineage                   | 7                        | 9.15E-04 |
| hsa04971                                      | Gastric acid secretion                       | 6                        | 1.21E-03 |
| hsa00982                                      | Drug metabolism - cytochrome P450            | 5                        | 1.71E-03 |
| hsa00051                                      | Fructose and mannose metabolism              | 4                        | 2.01E-03 |

Abbreviation: DEGs, differential expressed genes.

**Supplementary Table 3: The 11 amplified genes with direct PPI interaction with 5-FU metabolism-related genes**

| Amplified genes           | Gene ID | Region  | 5-FU-metabolism-related genes | Gene ID | 5-FU-metabolism-related pathways          |
|---------------------------|---------|---------|-------------------------------|---------|-------------------------------------------|
| <i>PMS2</i> <sup>a</sup>  | 5395    | -       | <i>PMS2</i>                   | 5395    | DNArepair/apoptosis/cell cycle regulation |
| <i>HMGB1</i> <sup>a</sup> | 3146    | -       | <i>HMGB1</i>                  | 3146    | DNArepair/apoptosis/cell cycle regulation |
| <i>BRCA2</i>              | 675     | 13q12.3 | <i>TP53</i>                   | 7157    | DNArepair/apoptosis/cell cycle regulation |
| <i>HMGB1</i> <sup>a</sup> | 3146    | 13q12.3 | <i>TP53</i>                   | 7157    | DNArepair/apoptosis/cell cycle regulation |
| <i>KRAS</i>               | 3845    | 12p12.1 | <i>BCL2</i>                   | 596     | DNArepair/apoptosis/cell cycle regulation |
| <i>PMS2</i> <sup>a</sup>  | 5395    | 7p22.1  | <i>MLH1</i>                   | 4292    | DNArepair/apoptosis/cell cycle regulation |
| <i>PMS2</i> <sup>a</sup>  | 5395    | 7p22.1  | <i>EXO1</i>                   | 9156    | DNArepair/apoptosis/cell cycle regulation |
| <i>RFC3</i>               | 5983    | 13q12.3 | <i>ATR</i>                    | 545     | DNArepair/apoptosis/cell cycle regulation |
| <i>RFC3</i>               | 5983    | 13q12.3 | <i>CHEK1</i>                  | 1111    | DNArepair/apoptosis/cell cycle regulation |
| <i>RPA3</i>               | 6119    | 7p22.1  | <i>ATR</i>                    | 545     | DNArepair/apoptosis/cell cycle regulation |
| <i>RPA3</i>               | 6119    | 7p22.1  | <i>CHEK1</i>                  | 1111    | DNArepair/apoptosis/cell cycle regulation |
| <i>GNAI2</i>              | 2768    | 7p22.1  | <i>ACTB</i>                   | 60      | Housekeeping (cytoskeleton)               |
| <i>RAC1</i>               | 5879    | 7p22.1  | <i>ACTB</i>                   | 60      | Housekeeping (cytoskeleton)               |
| <i>EIF3B</i>              | 8662    | 7p22.1  | <i>ACTB</i>                   | 60      | Housekeeping (cytoskeleton)               |
| <i>EGFR</i>               | 1956    | 7p11.2  | <i>GAPDH</i>                  | 2597    | Housekeeping (glycolysis)                 |
| <i>RBM48</i>              | 84060   | 7q21.2  | <i>TK1</i>                    | 7083    | Pyrimidine metabolism                     |

<sup>a</sup>This gene is 5-FU metabolism-related.

**Supplementary Table S4: The 8 mutation genes with direct PPI interaction with 5-FU metabolism-related genes**

| Mutation genes | Gene ID | 5-FU-metabolism-related genes | Gene ID | 5-FU-metabolism-related pathways           |
|----------------|---------|-------------------------------|---------|--------------------------------------------|
| <i>ENTPD2</i>  | 954     | <i>ENTPD1</i>                 | 953     | Pyrimidine metabolism                      |
| <i>ENTPD2</i>  | 954     | <i>ENTPD3</i>                 | 956     | Pyrimidine metabolism                      |
| <i>ENTPD2</i>  | 954     | <i>RRM1</i>                   | 6240    | Pyrimidine metabolism                      |
| <i>ENTPD2</i>  | 954     | <i>RRM2</i>                   | 6241    | Pyrimidine metabolism                      |
| <i>ENTPD2</i>  | 954     | <i>RRM2B</i>                  | 50484   | Pyrimidine metabolism                      |
| <i>ENTPD2</i>  | 954     | <i>PNPT1</i>                  | 87178   | Pyrimidine metabolism                      |
| <i>ENTPD2</i>  | 954     | <i>CANT1</i>                  | 124583  | Pyrimidine metabolism                      |
| <i>GRM1</i>    | 2911    | <i>GAPDH</i>                  | 2597    | Housekeeping (glycolysis)                  |
| <i>RAB4A</i>   | 5867    | <i>ACTB</i>                   | 60      | Housekeeping (cytoskeleton)                |
| <i>BNIP1</i>   | 662     | <i>BCL2</i>                   | 596     | DNA repair/apoptosis/cell cycle regulation |
| <i>MSH4</i>    | 4438    | <i>MLH1</i>                   | 4292    | DNA repair/apoptosis/cell cycle regulation |
| <i>RAB4A</i>   | 5867    | <i>TP53</i>                   | 7157    | DNA repair/apoptosis/cell cycle regulation |
| <i>UBE3A</i>   | 7337    | <i>TP53</i>                   | 7157    | DNA repair/apoptosis/cell cycle regulation |
| <i>TP53I3</i>  | 9540    | <i>TP53</i>                   | 7157    | DNA repair/apoptosis/cell cycle regulation |
| <i>TIPARP</i>  | 25976   | <i>ATM</i>                    | 472     | DNA repair/apoptosis/cell cycle regulation |

**Supplementary Table S5: The 19 hypermethylation-mediated down-regulation genes with direct PPI interaction with 5-FU metabolism-related genes**

| Hypermethylation-mediated down-regulation genes | Gene ID | 5-FU-metabolism-related genes | Gene ID | 5-FU-metabolism-related pathways |
|-------------------------------------------------|---------|-------------------------------|---------|----------------------------------|
| <i>ENTPD3<sup>a</sup></i>                       | 956     | <i>TYMS</i>                   | 7298    | Transporters                     |
| <i>ENTPD3<sup>a</sup></i>                       | 956     | <i>ENTPD3</i>                 | 956     | Pyrimidine metabolism            |
| <i>ENTPD5<sup>a</sup></i>                       | 957     | <i>ENTPD5</i>                 | 957     | Pyrimidine metabolism            |
| <i>ADCY5</i>                                    | 111     | <i>NUDT2</i>                  | 318     | Pyrimidine metabolism            |
| <i>ADCY5</i>                                    | 111     | <i>ENTPD1</i>                 | 953     | Pyrimidine metabolism            |
| <i>ADCY5</i>                                    | 111     | <i>ITPA</i>                   | 3704    | Pyrimidine metabolism            |
| <i>ADCY5</i>                                    | 111     | <i>NME1</i>                   | 4830    | Pyrimidine metabolism            |
| <i>ADCY5</i>                                    | 111     | <i>NME2</i>                   | 4831    | Pyrimidine metabolism            |
| <i>ADCY5</i>                                    | 111     | <i>NME4</i>                   | 4833    | Pyrimidine metabolism            |
| <i>ADCY5</i>                                    | 111     | <i>NME6</i>                   | 10201   | Pyrimidine metabolism            |
| <i>ADCY5</i>                                    | 111     | <i>NME7</i>                   | 29922   | Pyrimidine metabolism            |
| <i>ADCY5</i>                                    | 111     | <i>CANT1</i>                  | 124583  | Pyrimidine metabolism            |

|                           |     |               |        |                       |
|---------------------------|-----|---------------|--------|-----------------------|
| <i>ENTPD3<sup>a</sup></i> | 956 | <i>NUDT2</i>  | 318    | Pyrimidine metabolism |
| <i>ENTPD3<sup>a</sup></i> | 956 | <i>ENTPD1</i> | 953    | Pyrimidine metabolism |
| <i>ENTPD3<sup>a</sup></i> | 956 | <i>ENTPD6</i> | 955    | Pyrimidine metabolism |
| <i>ENTPD<sup>a</sup></i>  | 956 | <i>CTPS1</i>  | 1503   | Pyrimidine metabolism |
| <i>ENTPD3<sup>a</sup></i> | 956 | <i>DTYMK</i>  | 1841   | Pyrimidine metabolism |
| <i>ENTPD3<sup>a</sup></i> | 956 | <i>ITPA</i>   | 3704   | Pyrimidine metabolism |
| <i>ENTPD3<sup>a</sup></i> | 956 | <i>NME1</i>   | 4830   | Pyrimidine metabolism |
| <i>ENTPD3<sup>a</sup></i> | 956 | <i>NME2</i>   | 4831   | Pyrimidine metabolism |
| <i>ENTPD3<sup>a</sup></i> | 956 | <i>NME4</i>   | 4833   | Pyrimidine metabolism |
| <i>ENTPD3<sup>a</sup></i> | 956 | <i>NT5E</i>   | 4907   | Pyrimidine metabolism |
| <i>ENTPD3<sup>a</sup></i> | 956 | <i>RRM1</i>   | 6240   | Pyrimidine metabolism |
| <i>ENTPD3<sup>a</sup></i> | 956 | <i>RRM2</i>   | 6241   | Pyrimidine metabolism |
| <i>ENTPD3<sup>a</sup></i> | 956 | <i>TK1</i>    | 7083   | Pyrimidine metabolism |
| <i>ENTPD3<sup>a</sup></i> | 956 | <i>TK2</i>    | 7084   | Pyrimidine metabolism |
| <i>ENTPD3<sup>a</sup></i> | 956 | <i>UCK2</i>   | 7371   | Pyrimidine metabolism |
| <i>ENTPD3<sup>a</sup></i> | 956 | <i>UMPS</i>   | 7372   | Pyrimidine metabolism |
| <i>ENTPD3<sup>a</sup></i> | 956 | <i>ENTPD4</i> | 9583   | Pyrimidine metabolism |
| <i>ENTPD3<sup>a</sup></i> | 956 | <i>NME6</i>   | 10201  | Pyrimidine metabolism |
| <i>ENTPD3<sup>a</sup></i> | 956 | <i>NME7</i>   | 29922  | Pyrimidine metabolism |
| <i>ENTPD3<sup>a</sup></i> | 956 | <i>NT5C</i>   | 30833  | Pyrimidine metabolism |
| <i>ENTPD3<sup>a</sup></i> | 956 | <i>RRM2B</i>  | 50484  | Pyrimidine metabolism |
| <i>ENTPD3<sup>a</sup></i> | 956 | <i>AK3</i>    | 50808  | Pyrimidine metabolism |
| <i>ENTPD3<sup>a</sup></i> | 956 | <i>NT5C3</i>  | 51251  | Pyrimidine metabolism |
| <i>ENTPD3<sup>a</sup></i> | 956 | <i>CTPS2</i>  | 56474  | Pyrimidine metabolism |
| <i>ENTPD3<sup>a</sup></i> | 956 | <i>NT5M</i>   | 56953  | Pyrimidine metabolism |
| <i>ENTPD3<sup>a</sup></i> | 956 | <i>UCK1</i>   | 83549  | Pyrimidine metabolism |
| <i>ENTPD3<sup>a</sup></i> | 956 | <i>NT5C1A</i> | 84618  | Pyrimidine metabolism |
| <i>ENTPD3<sup>a</sup></i> | 956 | <i>PNPT1</i>  | 87178  | Pyrimidine metabolism |
| <i>ENTPD3<sup>a</sup></i> | 956 | <i>NT5C1B</i> | 93034  | Pyrimidine metabolism |
| <i>ENTPD3<sup>a</sup></i> | 956 | <i>CANT1</i>  | 124583 | Pyrimidine metabolism |
| <i>ENTPD5<sup>a</sup></i> | 957 | <i>ENTPD1</i> | 953    | Pyrimidine metabolism |
| <i>ENTPD5<sup>a</sup></i> | 957 | <i>ITPA</i>   | 3704   | Pyrimidine metabolism |
| <i>ENTPD5<sup>a</sup></i> | 957 | <i>NME1</i>   | 4830   | Pyrimidine metabolism |
| <i>ENTPD5<sup>a</sup></i> | 957 | <i>NME2</i>   | 4831   | Pyrimidine metabolism |
| <i>ENTPD5<sup>a</sup></i> | 957 | <i>NME4</i>   | 4833   | Pyrimidine metabolism |
| <i>ENTPD5<sup>a</sup></i> | 957 | <i>NT5E</i>   | 4907   | Pyrimidine metabolism |

---

|                           |      |               |        |                       |
|---------------------------|------|---------------|--------|-----------------------|
| <i>ENTPD5<sup>a</sup></i> | 957  | <i>RRM1</i>   | 6240   | Pyrimidine metabolism |
| <i>ENTPD5<sup>a</sup></i> | 957  | <i>RRM2</i>   | 6241   | Pyrimidine metabolism |
| <i>ENTPD5<sup>a</sup></i> | 957  | <i>UCK2</i>   | 7371   | Pyrimidine metabolism |
| <i>ENTPD5<sup>a</sup></i> | 957  | <i>UMPS</i>   | 7372   | Pyrimidine metabolism |
| <i>ENTPD5<sup>a</sup></i> | 957  | <i>NME6</i>   | 10201  | Pyrimidine metabolism |
| <i>ENTPD5<sup>a</sup></i> | 957  | <i>NME7</i>   | 29922  | Pyrimidine metabolism |
| <i>ENTPD5<sup>a</sup></i> | 957  | <i>NT5C</i>   | 30833  | Pyrimidine metabolism |
| <i>ENTPD5<sup>a</sup></i> | 957  | <i>RRM2B</i>  | 50484  | Pyrimidine metabolism |
| <i>ENTPD5<sup>a</sup></i> | 957  | <i>AK3</i>    | 50808  | Pyrimidine metabolism |
| <i>ENTPD5<sup>a</sup></i> | 957  | <i>NT5C3</i>  | 51251  | Pyrimidine metabolism |
| <i>ENTPD5<sup>a</sup></i> | 957  | <i>NT5M</i>   | 56953  | Pyrimidine metabolism |
| <i>ENTPD5<sup>a</sup></i> | 957  | <i>UCK1</i>   | 83549  | Pyrimidine metabolism |
| <i>ENTPD5<sup>a</sup></i> | 957  | <i>NT5C1A</i> | 84618  | Pyrimidine metabolism |
| <i>ENTPD5<sup>a</sup></i> | 957  | <i>PNPT1</i>  | 87178  | Pyrimidine metabolism |
| <i>ENTPD5<sup>a</sup></i> | 957  | <i>NT5C1B</i> | 93034  | Pyrimidine metabolism |
| <i>ENTPD5<sup>a</sup></i> | 957  | <i>CANT1</i>  | 124583 | Pyrimidine metabolism |
| <i>ESR1</i>               | 2099 | <i>DUT</i>    | 1854   | Pyrimidine metabolism |
| <i>GMPR</i>               | 2766 | <i>ENTPD1</i> | 953    | Pyrimidine metabolism |
| <i>GMPR</i>               | 2766 | <i>ENTPD6</i> | 955    | Pyrimidine metabolism |
| <i>GMPR</i>               | 2766 | <i>ITPA</i>   | 3704   | Pyrimidine metabolism |
| <i>GMPR</i>               | 2766 | <i>NT5E</i>   | 4907   | Pyrimidine metabolism |
| <i>GMPR</i>               | 2766 | <i>ENTPD4</i> | 9583   | Pyrimidine metabolism |
| <i>GMPR</i>               | 2766 | <i>NT5C</i>   | 30833  | Pyrimidine metabolism |
| <i>GMPR</i>               | 2766 | <i>NT5C3</i>  | 51251  | Pyrimidine metabolism |
| <i>GMPR</i>               | 2766 | <i>NT5M</i>   | 56953  | Pyrimidine metabolism |
| <i>GMPR</i>               | 2766 | <i>NT5C1A</i> | 84618  | Pyrimidine metabolism |
| <i>GMPR</i>               | 2766 | <i>NT5C1B</i> | 93034  | Pyrimidine metabolism |
| <i>GMPR</i>               | 2766 | <i>CANT1</i>  | 124583 | Pyrimidine metabolism |
| <i>LYZ</i>                | 4069 | <i>NME2</i>   | 4831   | Pyrimidine metabolism |
| <i>PDE1C</i>              | 5137 | <i>ENTPD1</i> | 953    | Pyrimidine metabolism |
| <i>PDE1C</i>              | 5137 | <i>ENTPD6</i> | 955    | Pyrimidine metabolism |
| <i>PDE1C</i>              | 5137 | <i>ITPA</i>   | 3704   | Pyrimidine metabolism |
| <i>PDE1C</i>              | 5137 | <i>NT5E</i>   | 4907   | Pyrimidine metabolism |
| <i>PDE1C</i>              | 5137 | <i>ENTPD4</i> | 9583   | Pyrimidine metabolism |
| <i>PDE1C</i>              | 5137 | <i>NT5C</i>   | 30833  | Pyrimidine metabolism |
| <i>PDE1C</i>              | 5137 | <i>NT5C3</i>  | 51251  | Pyrimidine metabolism |

|                           |       |               |        |                                            |
|---------------------------|-------|---------------|--------|--------------------------------------------|
| <i>PDE1C</i>              | 5137  | <i>NT5M</i>   | 56953  | Pyrimidine metabolism                      |
| <i>PDE1C</i>              | 5137  | <i>NT5C1A</i> | 84618  | Pyrimidine metabolism                      |
| <i>PDE1C</i>              | 5137  | <i>NT5C1B</i> | 93034  | Pyrimidine metabolism                      |
| <i>PDE1C</i>              | 5137  | <i>CANT1</i>  | 124583 | Pyrimidine metabolism                      |
| <i>TIAM1</i>              | 7074  | <i>NME1</i>   | 4830   | Pyrimidine metabolism                      |
| <i>CBS</i>                | 875   | <i>MTR</i>    | 4548   | Folate metabolism                          |
| <i>CBS</i>                | 875   | <i>SHMT1</i>  | 6470   | Folate metabolism                          |
| <i>CBS</i>                | 875   | <i>SHMT2</i>  | 6472   | Folate metabolism                          |
| <i>ENTPD<sup>a</sup></i>  | 956   | <i>ATIC</i>   | 471    | Folate metabolism                          |
| <i>ENTPD5<sup>a</sup></i> | 957   | <i>ATIC</i>   | 471    | Folate metabolism                          |
| <i>GMPR</i>               | 2766  | <i>ATIC</i>   | 471    | Folate metabolism                          |
| <i>CD8A</i>               | 925   | <i>B2M</i>    | 567    | Housekeeping (MHC I class molecule)        |
| <i>LILRA1</i>             | 11024 | <i>B2M</i>    | 567    | Housekeeping (MHC I class molecule)        |
| <i>CAMK4</i>              | 814   | <i>GAPDH</i>  | 2597   | Housekeeping (glycolysis)                  |
| <i>GAS7</i>               | 8522  | <i>GAPDH</i>  | 2597   | Housekeeping (glycolysis)                  |
| <i>CD4</i>                | 920   | <i>ACTB</i>   | 60     | Housekeeping (cytoskeleton)                |
| <i>PRKCB</i>              | 5579  | <i>ACTB</i>   | 60     | Housekeeping (cytoskeleton)                |
| <i>CDK5R2</i>             | 8941  | <i>ACTB</i>   | 60     | Housekeeping (cytoskeleton)                |
| <i>CORO1A</i>             | 11151 | <i>ACTB</i>   | 60     | Housekeeping (cytoskeleton)                |
| <i>PARVG</i>              | 64098 | <i>ACTB</i>   | 60     | Housekeeping (cytoskeleton)                |
| <i>CR2</i>                | 1380  | <i>TP53</i>   | 7157   | DNA repair/apoptosis/cell cycle regulation |
| <i>ESR1</i>               | 2099  | <i>TP53</i>   | 7157   | DNA repair/apoptosis/cell cycle regulation |

<sup>a</sup>This gene is 5-FU metabolism-related.
